# Supplementary material for: Multimodal Feature Fusion Machine Learning for Predicting Chronic Injury Induced by Engineered Nanomaterials
Source: Research Square preprint supplement (doi:10.21203/rs.3.rs-3479434/v1), 2023-11-03
Supplement: Supplementary file 1 [file 3be05b2a08161914a8917320.xlsx]

## Sheet: Table S1
Table S1 Commercial source information and characterization for metal oxide nanoparticles
NO.	Metal oxide nanoparticles	Shape	Primary Size (nm)	Source	References	Crystal system	Hydrodynamic size (nm)	Zeta-potential (mV)	Dissociation degree in PSF solution	Dissociation degree in SLF solution	Molecular weight	The number of metal atoms	The number of oxygen atoms	The atomic ratio of metal and oxygen atoms	Electronegativity of metal atoms	Cation charge	Periodic number of metal elements	Group number of metal elements
1	Bi2O3	Sphere	90-210nm	Shanghai Aladdin Biochemical Technology Co., Ltd.	—	—	1321	15.3	0.01091	0.00097	465.96	2	3	0.67	2.02	3	6	15
2	CeO2-1	Sphere	20-50nm	Shanghai Aladdin Biochemical Technology Co., Ltd.	—	Cubic	299.2	42.6	0.00049	0.000297	172.11	1	2	0.5	1.12	4	6	3
3	CeO2-2	Sphere	100nm	Shanghai Aladdin Biochemical Technology Co., Ltd.	—	Cubic	344.3	39.1	0.00027	0.0001	172.11	1	2	0.5	1.12	4	6	3
4	CeO2-3	Sphere	60nm	In-house Synthesis	DOI：10.1021/nn3012114	Cubic	1722	7.28	0.03226	0.00359	172.11	1	2	0.5	1.12	4	6	3
5	Co3O4-1	Sphere	15nm	In-house Synthesis	DOI: 10.1038/s41467-018-06869-9	Cubic	1121	-13.5	0.0002	8e-05	240.8	3	4	0.75	1.88	2.67	4	9
6	Co3O4-2	Sphere	580nm	In-house Synthesis	DOI: 10.1038/s41467-018-06869-9	Cubic	834.3	-11.6	0.00013	5e-05	240.8	3	4	0.75	1.88	2.67	4	9
7	Co3O4-3	roundedge	450nm	In-house Synthesis	DOI: 10.1038/s41467-018-06869-9	Cubic	809.8	-11.8	0.00011	3e-05	240.8	3	4	0.75	1.88	2.67	4	9
8	Co3O4-4	roundedge	400nm	In-house Synthesis	DOI: 10.1038/s41467-018-06869-9	Cubic	1070	-5.84	0	0	240.8	3	4	0.75	1.88	2.67	4	9
9	Co3O4-5	roundedge	500nm	In-house Synthesis	DOI: 10.1038/s41467-018-06869-9	Cubic	1148	-8.39	1e-05	0	240.8	3	4	0.75	1.88	2.67	4	9
10	Cr2O3	Sphere	130nm	In-house Synthesis	DOI: 10.1038/s41467-018-06869-9	Rhombohedral	667.5	-2.72	0.01048	0.00014	151.99	2	3	0.67	1.66	3	4	6
11	CuO-1	Rods	200*30nm	In-house Synthesis	DOI: 10.1038/s41467-018-06869-9	Monoclinic	314	-23.1	0.31269	0.01005	79.55	1	1	1	1.9	2	4	11
12	CuO-2	Rods	560*80nm	In-house Synthesis	DOI: 10.1038/s41467-018-06869-9	Monoclinic	495.5	-7.68	0.93657	0.01568	79.55	1	1	1	1.9	2	4	11
13	CuO-3	Rods	550*70nm	In-house Synthesis	DOI: 10.1038/s41467-018-06869-9	Monoclinic	1101	-13.1	0.70074	0.01504	79.55	1	1	1	1.9	2	4	11
14	CuO-4	Rods	590*60nm	In-house Synthesis	DOI: 10.1038/s41467-018-06869-9	Monoclinic	1110	-13.5	0.66769	0.01327	79.55	1	1	1	1.9	2	4	11
15	Dy2O3	Sphere	<40nm	Shanghai Aladdin Biochemical Technology Co., Ltd.	—	Cubic	1104	23.2	0.00894	0.00055	79.55	1	1	1	1.9	2	4	11
16	Er2O3	Plates	100*50nm	In-house Synthesis	DOI：10.1021/nn100292s	Cubic	1099	-2.21	0.00618	0.00169	382.52	2	3	0.67	1.24	3	6	3
17	Eu2O3-1	Sphere	80nm	In-house Synthesis	DOI：10.1021/nn3012114	Cubic	576.6	4.63	0.18955	0.01606	202.96	1	3	0.33	1.2	3	6	3
18	Eu2O3-2	Sphere	50nm	In-house Synthesis	DOI：10.1021/nn3012114	Cubic	1030	-5.17	0.0722	0.00538	202.96	1	3	0.33	1.2	3	6	3
19	Fe2O3-1	Sphere	53nm	In-house Synthesis	DOI: 10.1038/s41467-018-06869-9	Rhombohedral	356.8	-3.15	0.002	0.00022	159.69	2	3	0.67	1.83	3	4	8
20	Fe2O3-2	Rods	60*10nm	In-house Synthesis	DOI: 10.1038/s41467-018-06869-9	Rhombohedral	270.5	-7.33	0.00261	0.00026	159.69	2	3	0.67	1.83	3	4	8
21	Fe2O3-3	Plates	90*20nm	In-house Synthesis	DOI: 10.1021/ic100919a	Rhombohedral	959.3	1.28	0.00779	0.00059	159.69	2	3	0.67	1.83	3	4	8
22	Fe2O3-4	Rods	220*40nm	In-house Synthesis	DOI: 10.1038/s41467-018-06869-9	Rhombohedral	887.6	0.369	0.09922	0.00869	159.69	2	3	0.67	1.83	3	4	8
23	Gd2O3	Sphere	70nm	In-house Synthesis	DOI：10.1021/nn3012114	Cubic	542.9	0.767	0.02913	9e-05	208.25	1	3	0.33	1.2	3	6	3
24	In2O3-1	Sphere	<50nm	Shanghai Aladdin Biochemical Technology Co., Ltd.	—	Cubic	336.5	35.7	0.01508	0.00202	277.63	2	3	0.67	1.78	3	5	13
25	In2O3-2	Sphere	<100nm	Shanghai Aladdin Biochemical Technology Co., Ltd.	—	Cubic	297.6	36.6	0.087	0.00199	277.63	2	3	0.67	1.78	3	5	13
26	La2O3	Sphere	200nm	In-house Synthesis	DOI：10.1016/j.nano.2019.102037	Hexagonal	546.1	11	0.12558	0.00943	325.81	2	3	0.67	1.1	3	6	3
27	MgO	Sphere	50nm	Shanghai Aladdin Biochemical Technology Co., Ltd.	—	—	2172	4.51	0.55321	0.0034	40.3	1	1	1	1.31	2	3	2
28	MoO3	Sphere	50nm	Shanghai Aladdin Biochemical Technology Co., Ltd.	—	—	415.5	-29.5	0.74263	0.00306	143.95	1	3	0.33	2.16	6	5	6
29	Nd2O3	Rods	70*10nm	In-house Synthesis	DOI：10.1021/nn3012114	Cubic	772.4	-19.9	0.00576	0.00024	195.24	1	3	0.33	1.14	3	6	3
30	NiO-1	Sphere	<30nm	Shanghai Aladdin Biochemical Technology Co., Ltd.	—	Cubic	770.3	23.4	0.00702	0.00054	74.69	1	1	1	1.91	2	4	10
31	NiO-2	Sphere	50nm	Shanghai Aladdin Biochemical Technology Co., Ltd.	—	Cubic	838.3	24.8	0.00691	0.00055	74.69	1	1	1	1.91	2	4	10
32	Sb2O3	Sphere	<250nm	Shanghai Aladdin Biochemical Technology Co., Ltd.	—	Orthorhombic	1449	-7.15	0.17789	0.01472	291.52	2	3	0.67	2.05	3	5	15
33	Sm2O3	Sphere	100nm	In-house Synthesis	DOI：10.1021/nn100292s	Cubic	629.8	-4.22	0.01906	0.00176	348.8	2	3	0.67	1.17	3	6	3
34	SnO2	Sphere	50-70nm	Shanghai Aladdin Biochemical Technology Co., Ltd.	—	Tetragonal	1592	-13.3	0.00889	0.00081	150.71	1	2	0.5	1.96	4	5	14
35	Tb2O3	Sphere	100nm	In-house Synthesis	DOI：10.1021/nn100292s	Cubic	736.3	-9.02	0.01294	0.00097	365.86	2	3	0.67	1.1	3	6	3
36	TiO2-a-1	Sphere	5-10nm	Shanghai Aladdin Biochemical Technology Co., Ltd.	—	Tetragonal	615.7	12.2	0.03891	0.00346	79.87	1	2	0.5	1.54	4	4	4
37	TiO2-a-2	Sphere	40nm	Shanghai Aladdin Biochemical Technology Co., Ltd.	—	Tetragonal	873.9	12.8	0.02521	0.00177	79.87	1	2	0.5	1.54	4	4	4
38	TiO2-a-2	Sphere	100nm	Shanghai Aladdin Biochemical Technology Co., Ltd.	—	Tetragonal	43.3	-20.4	0.01933	0.00022	79.87	1	2	0.5	1.54	4	4	4
39	TiO2-r-1	Sphere	40nm	Shanghai Aladdin Biochemical Technology Co., Ltd.	—	Tetragonal	676.9	2.48	0.04158	0.00339	79.87	1	2	0.5	1.54	4	4	4
40	TiO2-r-2	Sphere	100nm	Shanghai Aladdin Biochemical Technology Co., Ltd.	—	Tetragonal	411.7	6.26	0.07638	0.00444	79.87	1	2	0.5	1.54	4	4	4
41	Tm2O3	Sphere	100nm	In-house Synthesis	DOI：10.1021/nn100292s	Cubic	1116	-1.72	0.00109	0.00048	385.86	2	3	0.67	1.25	3	6	3
42	Y2O3	Sphere	50nm	Shanghai Aladdin Biochemical Technology Co., Ltd.	—	Cubic	409.8	33.9	0.02181	0.00162	225.81	2	3	0.67	1.22	3	5	3
43	Yb2O3	Sphere	50nm	Shanghai Aladdin Biochemical Technology Co., Ltd.	—	Cubic	1094	22.9	0.00777	0.00183	394	2	3	0.67	1.1	3	6	3
44	ZnO-1	Sphere	30±10nm	Shanghai Aladdin Biochemical Technology Co., Ltd.	—	Hexagonal	3330	3.14	0.74851	0.01661	81.38	1	1	1	1.65	2	4	12
45	ZnO-2	Sphere	50±10nm	Shanghai Aladdin Biochemical Technology Co., Ltd.	—	Hexagonal	1386	13.3	0.7276	0.01572	81.38	1	1	1	1.65	2	4	12
46	ZnO-3	Sphere	90±10nm	Shanghai Aladdin Biochemical Technology Co., Ltd.	—	Hexagonal	350.8	15	0.6706	0.01257	81.38	1	1	1	1.65	2	4	12
47	α-Al2O3	Sphere	30nm	Shanghai Aladdin Biochemical Technology Co., Ltd.	—	Rhombohedral	474	28.9	0.17572	0.01617	101.96	2	3	0.67	1.61	3	3	13
48	α-MnO2-1	Rods	600*10nm	In-house Synthesis	DOI: 10.1038/s41467-018-06869-9	—	474.1	7.26	0.06516	0.00637	86.94	1	2	0.5	1.55	4	4	7
49	α-MnO2-2	Rods	650*10nm	In-house Synthesis	DOI: 10.1038/s41467-018-06869-9	—	2005	8.42	0.05738	0.00479	86.94	1	2	0.5	1.55	4	4	7
50	α-MnO2-3	Rods	700*10nm	In-house Synthesis	DOI: 10.1038/s41467-018-06869-9	—	3493	-1.12	0.11767	0.00957	86.94	1	2	0.5	1.55	4	4	7
51	γ-Al2O3-1	Sphere	10nm	Shanghai Aladdin Biochemical Technology Co., Ltd.	—	Rhombohedral	432.6	31.1	0.07686	0.00741	101.96	2	3	0.67	1.61	3	3	13
52	γ-Al2O3-2	Sphere	20nm	Shanghai Aladdin Biochemical Technology Co., Ltd.	—	Rhombohedral	301.7	31.3	0.04418	0.00326	101.96	2	3	0.67	1.61	3	3	13
*PSF: phagolysosomal simulated fluid. SLF: simulated lung fluid. TiO2-a: TiO2-anatase. TiO2-r: TiO2-rutile.

## Sheet: Table S2
Table S2-a Cellular events in THP-1 cells.
Metal oxide nanoparticles	a. Cell viability (%)						b. FC TNF-α						c. FC Il-1β						d. pH in lysosome						Metal oxide nanoparticles	e. FC MCP-1						f. FC Il-6						g. FC DCF						h. FC ATP
	MeONPs Concentration (μg/mL)						MeONPs Concentration (μg/mL)						MeONPs Concentration (μg/mL)						MeONPs Concentration (μg/mL)							MeONPs Concentration (μg/mL)						MeONPs Concentration (μg/mL)						MeONPs Concentration (μg/mL)						MeONPs Concentration (μg/mL)
	0	12.5	25	50	100	200	0	12.5	25	50	100	200	0	12.5	25	50	100	200	0	13	25	50	100	200		0	12.5	25	50	100	200	0	12.5	25	50	100	200	0	13	25	50	100	200	0	13	25	50	100	200
Bi2O3	100	98.4689	95.2943	98.9184	98.4408	97.7946	1	0.96821	0.98721	0.991631	0.925806	0.921623	1	0.696906	1.58112	2.16332	2.01596	2.16375	4.5	4.64588	4.75805	4.58063	4.70831	5.11574	Bi2O3	1	0.626466	0.622813	0.657255	0.658556	0.731471	1	1.12077	1.15371	1.17034	1.02344	1.15622	1	0.938653	0.962345	0.986479	0.988992	1.00613	1	0.67008	0.671969	0.729942	0.667165	0.699688
CeO2-1	100	108.595	101.796	105.754	102.657	91.9001	1	0.882125	0.857496	0.828457	0.843962	0.793512	1	3.7058	2.56658	3.59778	9.69727	22.3793	4.5	4.3084	4.47159	4.19113	3.96585	4.00622	CeO2-1	1	1.08003	1.07197	1.08095	1.10159	1.10693	1	0.773491	0.749653	1.01024	0.878164	0.71563	1	0.997433	1.02792	1.13293	1.21079	1.32287	1	1.01205	1.01553	0.795994	0.779422	0.797669
CeO2-2	100	96.6244	85.8032	95.7306	90.9425	87.5589	1	0.782822	0.809748	0.794081	0.777631	0.777671	1	0.814828	1.46064	1.44085	2.49321	1.49031	4.5	4.41472	4.29519	4.34019	4.09246	4.09695	CeO2-2	1	0.878964	0.804409	0.921696	0.817055	0.871762	1	1.06216	1.04299	1.05009	1.04288	1.01897	1	0.843935	0.774651	0.718914	0.823025	0.764551	1	1.1457	1.09347	1.12148	1.15995	1.0944
CeO2-3	100	91.0063	80.632	84.271	79.2275	67.0018	1	0.800428	0.806446	0.777673	0.703808	0.7422	1	9.89952	15.7233	20.0042	23.0578	23.973	4.5	4.60003	4.7703	4.66278	4.82002	5.37719	CeO2-3	1	0.846943	0.807738	0.872251	0.778875	0.662123	1	1.12207	1.12187	1.12216	1.14054	1.12714	1	0.999821	0.933234	0.856572	0.971386	1.03779	1	1.10185	1.10708	1.07124	0.989489	1.07434
Co3O4-1	100	89.5647	68.0551	55.5019	40.1631	28.2094	1	0.524135	0.36601	0.342618	0.287003	0.210695	1	13.4245	12.4162	12.5342	9.77167	5.98317	4.5	4.76957	4.71547	5.02583	5.28493	5.86018	Co3O4-1	1	0.604587	0.491743	0.43947	0.326885	0.27533	1	1.01435	1.04866	1.0055	0.956657	1.0035	1	0.86103	0.821759	0.815669	0.854939	0.948193	1	0.849786	0.820457	0.641301	0.60988	0.421424
Co3O4-2	100	89.6352	32.4055	15.1625	9.76749	8.63911	1	0.189667	0.192951	0.134104	0.0762657	0.0398424	1	0.796659	1.36434	0.715794	0.654387	1.02986							Co3O4-5	1	0.846473	0.670661	0.184029	0.265754	0.314254	1	1.04976	1.05719	1.04047	1.04394	0.968438	1	0.934275	0.875984	0.913158	0.981083	1.10532	1	0.905943	0.853756	0.829557	0.766626	0.585664
Co3O4-3	100	70.9465	53.3509	47.2154	38.5763	29.5846	1	0.268456	0.18614	0.156983	0.139102	0.128277	1	8.08757	5.37755	6.23969	4.64007	3.87721							Cr2O3	1	0.994745	1.03466	1.06534	1.13641	0.974728	1	1.02564	1.28049	0.913514	0.719832	0.674919	1	1.00052	0.920502	0.886584	0.864482	0.721306	1	1.06745	1.04259	0.979388	0.818569	0.721759
Co3O4-4	100	90.9752	74.2611	57.0887	45.946	35.6496	1	0.408238	0.290713	0.167368	0.140589	0.139169	1	5.16928	5.02898	3.94666	3.86538	3.84873							CuO-1	1	0.474965	0.388281	0.335549	0.269883	0.24046	1	1.03313	1.12232	1.05481	1.08876	1.03714	1	0.776238	1.09772	1.04558	1.09982	1.30496	1	0.833219	0.912175	0.652109	0.502477	0.303974
Co3O4-5	100	42.5471	38.1158	23.309	18.1573	14.5186	1	0.23693	0.311462	0.263028	0.248897	0.269217	1	3.66738	3.33632	2.96966	1.80392	0.925548	4.5	5.04065	4.93158	5.08012	5.47242	6.36934	CuO-3	1	0.776914	0.589972	0.627929	0.403299	0.32855	1	1.14341	1.16741	1.21674	1.14089	1.14114	1	1.00595	1.03429	0.989849	1.0836	1.12307	1	0.839858	0.756768	0.627396	0.597449	0.484777
Cr2O3	100	94.2789	95.7529	87.3804	81.219	65.2995	1	0.967607	0.961698	0.901772	0.811126	0.550477	1	1.17518	1.15495	1.67938	1.71957	1.6803	4.5	4.79643	4.95106	5.17873	5.08213	5.19146	Dy2O3	1	0.784063	0.670855	0.780539	0.863227	0.825005	1	1.22888	1.2679	1.29936	1.36302	1.35493	1	0.991936	0.975779	1.01663	1.03733	1.13486	1	1.09819	0.984217	0.927836	0.930909	0.861277
CuO-1	100	79.4421	56.8184	42.1734	28.6337	18.928	1	0.453201	0.331527	0.256546	0.214071	0.158527	1	5.30114	4.95763	3.27264	2.67894	1.17599	4.5	4.57367	5.18485	5.61414	7.10478	7.35777	Er2O3	1	1.04701	1.08639	1.09496	1.10251	1.09936	1	1.00368	0.832204	0.818831	0.961706	0.896431	1	0.920897	0.95506	0.957988	1.05554	0.990371	1	0.776484	0.80173	0.597032	0.637197	0.516975
CuO-2	100	57.0256	51.5338	42.2425	32.2259	22.7274	1	0.303632	0.241858	0.208489	0.138107	0.107892	1	4.48188	3.65235	2.03511	1.02506	0.500158							Eu2O3-1	1	1.02614	1.02192	1.01284	0.855716	1.0032	1	0.99063	1.03087	1.02494	1.03663	1.00764	1	0.781907	0.930991	1.01936	1.07088	1.04122	1	1.08744	1.05975	0.969187	0.979518	1.00036
CuO-3	100	73.7776	73.0522	58.6836	45.8001	35.9562	1	0.40884	0.350177	0.285642	0.21258	0.211145	1	3.58915	4.83891	4.78574	4.16948	3.38297	4.5	4.57465	4.09629	4.40412	4.41195	4.95207	Eu2O3-2	1	1.00754	0.982294	0.957809	1.17192	1.17438	1	0.645361	0.770973	0.757259	0.75254	0.820439	1	1.296	1.36186	1.29671	1.20857	1.21805	1	0.443525	0.586942	0.512064	0.437084	0.248908
CuO-4	100	45.5238	37.1306	30.9824	22.2783	18.7553	1	0.252232	0.210485	0.16958	0.118983	0.0845689	1	4.61341	2.00312	1.39957	0.622388	0.26677							Fe2O3-1	1	0.835651	1.01833	1.14414	1.14945	1.19	1	2.33687	1.86549	1.93926	1.97993	1.84395	1	1.13621	1.08698	1.12263	1.05503	1.09215	1	0.939401	0.910981	0.97546	0.803417	0.444275
Dy2O3	100	91.6351	84.9347	81.9427	80.9945	65.6974	1	1.01909	0.978744	1.00044	0.985567	0.898948	1	2.40663	2.24547	2.5401	3.22934	2.47553	4.5	4.86065	4.87639	5.07923	5.29037	5.11373	Fe2O3-2	1	1.02706	1.02148	1.01405	1.00532	1.00967	1	1.00405	0.988335	0.884465	0.741675	1.01499	1	1.20104	1.16223	1.23343	1.20681	1.21131	1	1.33787	0.80476	0.88255	0.781981	0.525169
Er2O3	100	69.3361	73.4344	82.5928	86.3147	79.0382	1	0.99658	1.00358	0.98875	0.973829	0.985593	1	1.31605	1.32089	1.33127	1.36783	1.37298	4.5	4.51703	4.45442	4.46156	4.32084	4.18872	Fe2O3-3	1	1.00799	1.01512	1.00936	0.997525	1.07691	1	0.499639	1.34763	0.493559	0.709882	0.836254	1	1.10892	1.0832	1.10498	1.18825	1.34217	1	0.867035	1.09896	0.879262	0.722391	0.619236
Eu2O3-1	100	94.8033	93.0048	83.0437	80.0692	73.3593	1	0.977661	1.04187	1.02379	1.11255	1.08142	1	12.8384	19.5411	20.4921	29.9909	29.264	4.5	4.50737	4.59038	4.54975	4.54975	4.50984	Fe2O3-4	1	1.02825	1.03252	1.0083	0.972436	1.03302	1	0.578538	1.25547	1.25447	1.09113	1.03884	1	0.971999	0.907886	0.947391	1.02808	1.08599	1	0.934749	0.746239	0.68927	0.69199	0.648499
Eu2O3-2	100	87.2979	83.8046	81.1068	82.3173	81.9369	1	0.78775	0.904015	0.837634	0.882031	1.00621	1	7.44393	14.5616	18.8773	26.0994	32.5294	4.5	4.28557	4.35633	4.51538	4.43195	4.34438	Gd2O3	1	0.992655	1.00799	1.06084	1.05175	1.08287	1	1.4829	1.60772	1.00101	1.04206	1.41032	1	0.994037	0.972838	0.985789	0.977587	1.02142	1	0.906733	0.90627	0.895295	0.752171	0.557722
Fe2O3-2	100	80.9945	84.9979	91.5508	96.8184	92.2461	1	0.835301	0.863266	0.973438	0.961807	0.977938	1	0.898033	1.55355	1.58488	1.33666	2.18215	4.5	4.59651	5.22753	5.09267	5.44376	6.42802	In2O3-1	1	0.77476	0.753063	0.736891	1.00247	1.16064	1	1.06438	1.10674	1.01483	1.08054	0.960597	1	1.02806	1.00762	1.01068	1.01341	1.02749	1	1.1501	1.06997	1.10274	1.11419	1.01934
Fe2O3-3	100	99.4803	95.21	95.7157	94.0862	82.8768	1	0.999835	0.997462	0.961041	0.970267	0.952264	1	0.657693	0.952186	0.889287	1.32894	1.56613	4.5	5.08277	5.13928	5.77011	6.0381	7.64751	In2O3-2	1	0.876327	0.891244	0.880491	0.897397	0.939318	1	1.20696	1.33124	1.29937	1.33899	1.32341	1	0.981942	1.02617	1.03572	1.0326	1.10331	1	1.0679	1.07438	1.09812	1.0387	0.970236
Fe2O3-4	100	114.128	113.168	112.799	105.862	88.852	1	1.13947	1.22607	1.19593	1.3488	1.36636	1	2.51086	3.0008	4.34213	12.8835	43.0567	4.5	4.67841	5.0392	5.33502	5.5213	6.86925	La2O3	1	0.78113	0.809527	0.759572	0.745134	0.699671	1	1.03723	1.07741	1.03492	1.04196	1.07739	1	0.908827	0.868694	0.754188	0.904112	0.842904	1	1.03798	0.870662	0.838059	0.891744	0.708979
Gd2O3	100	112.541	112.393	108.74	101.73	101.508	1	0.795475	0.888756	0.889644	0.903814	0.933863	1	4.23846	15.3386	28.7218	32.4649	36.7162	4.5	4.52202	4.47578	4.64062	4.70362	4.91489	MgO	1	1.51926	1.6822	1.71037	1.78429	2.07092	1	0.988605	1.02134	1.01559	0.985243	1.00004	1	1.00338	0.994093	1.01994	1.03025	1.01291	1	1.09726	1.14135	1.10553	1.21882	1.03107
In2O3-1	100	106.517	100.787	100.462	102.331	94.4063	1	1.05853	0.974285	1.07293	1.04026	1.06977	1	1.13256	1.26267	1.27822	1.36	1.38474	4.5	4.70363	4.60741	4.71066	4.71066	4.73187	MoO3	1	0.72	0.85	0.91	1.05	1	1	1.01431	1.01656	1.04027	1.06637	1.0982	1	0.961645	0.969224	0.947209	0.962794	1.00938	1	1.0501	1.09822	1.06579	1.01175	1.02447
In2O3-2	100	100.624	91.9272	97.0885	98.0232	96.2757	1	1.10141	1.0459	1.06595	1.0775	1.05294	1	1.15059	1.0769	1.27382	1.09006	0.989039	4.5	4.66203	4.77136	4.8389	4.77136	4.83343	Nd2O3	1	0.963023	0.988646	0.961149	0.912998	0.994867	1	1.01876	1.03964	1.01501	1.01688	1.00381	1	0.840887	0.950964	0.750225	0.849656	1.02905	1	1.26293	1.21691	1.10623	1.17586	1.05904
La2O3	100	131.555	125.492	124.494	117.471	115.399	1	0.965632	0.986445	0.977233	0.998408	0.985909	1	8.6872	10.1904	11.4762	11.3346	11.9855	4.5	4.4075	4.39286	4.32108	4.31873	4.23346	NiO-1	1	0.74215	0.703317	0.571784	0.524555	0.509652	1	1.11425	1.19604	1.21611	1.21701	1.17714	1	0.909395	0.942495	0.934171	0.929048	1.07282	1	0.596791	0.58879	0.607995	0.583087	0.617787
MgO	100	105.078	106.25	105.508	95.2735	93.125	1	0.812531	0.917836	0.825495	0.638285	0.520154	1	0.665297	0.369696	0.319602	0.376672	0.347181	4.5	4.58078	4.86051	4.85235	4.98335	5.19521	NiO-2	1	0.516537	0.578018	0.479136	0.405814	0.363855	1	1.11698	1.2159	1.24055	1.27787	1.26762	1	0.956286	0.962246	0.988918	0.997365	1.04573	1	0.650514	0.656486	0.711877	0.639957	0.615287
MoO3	100	110.61	107.877	111.025	107.151	102.689	1	0.95727	0.876974	0.812157	0.810699	0.752554	1	1.07301	2.49093	1.06174	1.53948	1.74566	4.5	4.50942	4.63065	4.71429	4.81173	5.14516	Sb2O3	1	0.440472	0.416253	0.402389	0.325344	0.323663	1	1.00584	1.30499	1.35492	1.30093	1.3289	1	1.02413	0.992894	1.06073	1.11916	1.21627	1	0.857331	0.953602	0.919271	0.968246	0.888858
Nd2O3	100	101.202	91.4137	87.1249	78.0977	84.6347	1	0.907824	0.790702	0.620193	0.609751	0.718524	1	2.53019	2.54491	2.72497	4.7858	6.9354	4.5	4.54025	4.73892	4.78639	5.01389	5.2641	Sm2O3	1	0.059	0.049	0.04	0.13	0.12	1	1.02411	1.00869	0.96186	0.997005	0.961666	1	1.00789	1.00508	0.988685	1.01104	1.04898	1	0.913568	1.02826	0.851252	0.859947	0.803097
NiO-1	100	83.6773	79.654	86.1564	96.7634	88.1071	1	1.01014	1.0882	1.0328	1.08475	1.05171	1	1.1955	1.25245	1.24039	1.18675	1.21748	4.5	4.76969	4.61175	4.74801	4.8192	4.83314	SnO2	1	0.97138	1.05872	1.10185	1.00278	1.01052	1	1.10501	1.11599	1.14055	1.12408	1.15819	1	0.951607	0.935747	0.953873	1.04756	1.05406	1	0.673678	0.660291	0.646071	0.643064	0.694915
NiO-2	100	94.0811	83.4742	87.213	90.5455	79.8978	1	1.06582	1.07986	1.07557	1.06327	1.06122	1	1.25658	1.1411	1.15031	1.11029	0.891818	4.5	4.56894	4.57619	4.56653	4.67514	4.7811	Tb2O3	1	1.03987	1.00492	1.01253	1.0825	1.18868	1	1.00828	1.06897	1.15364	1.24462	1.13505	1	0.967196	0.938516	0.907299	1.43185	1.61806	1	0.637951	0.886715	0.558283	0.485679	0.41531
Sb2O3	100	119.648	124.961	126.328	110.625	100.43	1	0.796216	0.687585	0.56464	0.357965	0.214075	1	1.46916	0.683366	1.07896	2.46254	1.82402	4.5	4.66684	4.58543	4.78426	4.78426	4.74615	TiO2-a-1	1	0.563828	1.14182	1.06583	1.2661	1.52461	1	0.978477	0.971428	0.985773	0.987589	0.975404	1	1.00925	1.03299	1.01503	1.04244	1.09429	1	1.2376	1.34729	1.14398	1.05459	1.02045
Sm2O3	100	80.6691	86.6074	83.6383	95.724	83.7219	1	0.979501	0.976112	0.982984	0.97674	0.976581	1	1.37228	1.25197	1.28913	0.927438	1.00152	4.5	4.544	4.5299	4.74652	4.7955	4.97518	TiO2-a-2	1	0.509084	0.472657	0.616097	0.625221	0.695902	1	0.91707	1.10788	1.28373	1.38988	1.28819	1	1.03003	1.0231	1.02459	1.05017	1.11184	1	1.33	1.27	1.28	1.08	1.2
SnO2	100	103.555	98.8282	93.3594	95.1953	90.4688	1	0.815006	0.838458	0.796711	0.8908	0.891739	1	0.542056	0.787292	1.56543	5.64395	7.47213	4.5	4.6141	4.7805	4.85809	5.0238	5.07879	TiO2-a-3	1	1.16864	0.905106	1.26529	1.17678	1.0511	1	1.31537	1.48182	1.39669	1.3157	1.33108	1	0.997819	1.02645	1.06821	1.13421	1.25464	1	1.9	1.79	1.68	1.32	1.3
Tb2O3	100	115.514	120.464	121.27	130.097	129.445	1	0.970665	0.974194	0.987155	0.988874	0.965855	1	2.01162	3.39414	4.56033	4.90563	8.60695	4.5	4.43432	4.48574	4.37729	4.23567	4.26967	TiO2-r-1	1	1.31599	1.28294	1.41488	1.47172	1.3699	1	1.10621	1.27377	1.29413	1.26606	1.35647	1	0.997893	1.04964	1.13525	1.2867	1.47178	1	2.31	1.76	1.54	1.32	1.14
TiO2-a-1	100	87.1333	91.7242	97.7631	88.7047	86.4247	1	0.927535	0.958087	1.01331	1.01538	0.906777	1	2.36037	2.62442	2.97303	3.44326	3.2797	4.5	4.58933	4.8086	4.72103	5.16576	6.12787	TiO2-r-2	1	1.02567	0.964355	1.04305	1.29914	1.5662	1	1.02397	1.026	1.05545	1.19893	1.20518	1	0.998192	1.0193	1.03413	1.08052	1.17544	1	1.56	1.43	1.27	1.18	1.09
TiO2-a-2	100	112.793	106.417	105.071	100.681	98.4699	1	1.01522	0.99424	1.02188	1.00416	1.00436	1	2.239	2.29985	2.67935	3.82044	4.7974	4.5	4.51076	4.57416	4.6577	4.71118	4.91997	Tm2O3	1	0.09	0.18	0.28	0.66	0.63	1	1.09219	1.10628	1.06033	1.07653	1.05915	1	0.989366	1.00201	1.00525	1.01108	1.04604	1	0.84096	0.846653	0.852644	0.748441	0.76055
TiO2-a-3	100	98.2777	94.3043	92.4137	89.7541	95.8423	1	1.02475	1.03733	1.00249	0.986308	0.994375	1	1.61537	2.01021	1.77558	2.74232	3.22513	4.5	4.89353	5.09202	4.79998	4.92058	5.56361	Y2O3	1	0.579277	0.576039	0.47663	0.490834	0.416719	1	1.20178	1.29753	1.36692	1.33104	1.32326	1	0.93576	0.956415	1.01084	1.02504	1.12619	1	0.747804	0.760684	0.778513	0.771359	0.7811
TiO2-r-1	100	95.4258	88.2961	91.3883	95.1053	95.7142	1	0.895337	0.885986	0.941066	0.960924	0.993703	1	2.55871	2.58955	2.32317	3.00206	3.75425	4.5	4.69981	4.78316	4.80515	4.7344	5.1579	Yb2O3	1	0.988755	1.01939	0.989889	1.07978	1.16144	1	0.969461	1.15478	1.20076	1.33231	1.43385	1	0.956894	0.948714	0.943693	1.06007	1.02978	1	0.852517	0.791505	0.670968	0.861316	0.538927
TiO2-r-2	100	92.7662	89.3375	83.6017	80.878	83.6337	1	1.0032	0.996184	0.915977	0.912828	0.895133	1	1.07255	1.28845	1.95674	2.58291	3.17043	4.5	4.62329	4.80495	4.82143	4.87435	4.87154	ZnO-1	1	0.202379	0.16069	0.0976551	0.148398	0.101471	1	0.971174	1.03684	1.03668	1.04984	0.990195	1	1.03647	1.01058	1.02635	1.06587	1.1352	1	0.836232	0.62288	0.501997	0.512541	0.419557
Tm2O3	100	99.3956	109.45	105.613	103.771	103.003	1	0.97701	0.956998	0.974702	0.973209	0.963867	1	6.57005	8.18368	8.67737	10.1988	11.9736	4.5	4.72059	4.85546	4.71545	4.79635	5.10124	ZnO-2	1	0.185781	0.161787	0.10519	0.0900875	0.141706	1	0.962152	0.975401	0.986329	1.02723	1.03237	1	1.02534	1.02815	1.04072	1.08687	1.20689	1	0.775487	0.736512	0.659686	0.597241	0.39583
Y2O3	100	94.1904	87.5868	93.7777	93.1586	92.2742	1	0.917783	0.912342	0.995509	1.02244	1.02538	1	1.96447	2.13272	2.96179	2.2819	2.7428	4.5	4.62398	4.80996	4.88112	5.03527	5.24219	ZnO-3	1	0.246737	0.19321	0.134122	0.107355	0.061139	1	1.0167	0.964377	1.0388	1.04477	1.04477	1	1.06438	1.01722	1.02807	1.03986	1.15512	1	0.92603	0.701512	0.745144	0.632112	0.613292
Yb2O3	100	88.5199	85.4573	85.9001	84.5717	92.5788	1	0.575527	0.604963	0.802143	0.869792	0.859706	1	3.68142	6.93201	13.1201	19.063	22.2146	4.5	4.7173	4.49214	4.54238	4.48953	4.59102	α-Al2O3	1	0.671593	0.655591	0.642089	0.538093	0.9292	1	1.21405	1.30858	1.30307	1.36562	1.03928	1	0.975831	0.990283	0.940383	0.976462	0.980449	1	1.29303	1.20833	1.13963	1.23829	1.09009
ZnO-1	100	72.2688	63.2622	25.0383	20.2828	14.4105	1	0.13124	0.152529	0.137365	0.127245	0.103322	1	0.8367	2.0377	1.50623	0.709159	0.636054	4.5	4.63332	4.79568	4.82285	4.67002	4.72181	α-MnO2-2	1	0.717317	0.75821	0.759535	0.654135	0.725706	1	1.02951	1.03183	0.985322	0.953952	0.907968	1	1.02092	1.02948	1.24345	1.22595	1.29404	1	0.958717	0.85242	0.833715	0.66224	0.565417
ZnO-2	100	85.4184	48.7796	27.8123	25.9029	21.1114	1	0.157925	0.155456	0.133772	0.126732	0.108951	1	0.507564	0.592568	0.718194	0.642721	0.654312	4.5	5.04743	5.20426	5.48514	5.46856	5.70303	β-MnO2-3	1	1.03419	1.00926	1.01429	0.975992	0.825174	1	1.01248	1.05108	1.01579	1.05873	1.0496	1	0.964983	0.98883	1.02276	1.00534	1.03269	1	0.640618	0.634443	0.477242	0.459944	0.267044
ZnO-3	100	111.758	78.5938	41.4063	32.1485	31.4844	1	0.255057	0.19031	0.181067	0.158632	0.151091	1	0.983294	1.02807	1.56351	3.37779	3.81825	4.5	5.07464	5.23332	5.27455	5.79814	6.16797	γ-Al2O3-1	1	0.702687	0.767916	0.678168	0.893553	1.24597	1	1.19339	1.2247	1.26135	1.31219	1.2491	1	0.967625	0.975798	0.944436	0.940915	0.971678	1	1.24986	1.06807	1.10936	1.04584	1.03103
α-Al2O3	100	96.9928	100.474	95.6371	98.9955	99.889	1	1.0392	1.03026	1.03379	1.07286	1.09373	1	2.54177	2.4421	2.49341	2.79744	3.778	4.5	4.77157	4.80269	5.04108	5.12663	5.36231	γ-Al2O3-2	1	0.722938	0.79625	0.775086	0.92139	0.959759	1	1.15368	1.22019	1.24947	1.31812	1.19559	1	0.9851	0.978323	0.953871	0.959519	0.995399	1	1.10209	1.00499	0.980367	1.02474	0.986041
α-MnO2-1	100	87.9765	75.5553	58.4657	46.7948	32.2062	1	0.993836	1.00902	1.0388	0.967599	1.01746	1	3.42542	3.5625	6.00496	6.27172	7.88865	4.5	4.60984	4.67645	4.66201	4.79775	4.84132
α-MnO2-2	100	61.2445	52.7414	45.6555	43.9882	39.959	1	0.949819	0.946043	0.930083	0.929234	0.908537	1	3.71567	4.22823	3.30447	4.14666	5.76847	4.5	4.7715	5.04	4.97924	5.46618	5.70092
α-MnO2-3	100	67.7747	58.4657	48.3509	41.793	26.3707	1	0.950033	0.981772	0.996433	0.953323	0.980294	1	3.65928	4.66675	5.3879	5.75431	6.65448	4.5	4.65844	4.8807	4.93405	5.35039	5.9201
γ-Al2O3-1	100	103.186	107.068	101.306	93.6036	94.4047	1	1.04039	1.08466	1.08332	1.03541	1.05303	1	1.25029	1.12093	1.16973	1.52743	2.09242	4.5	4.73719	4.73966	4.72978	4.76454	4.82533
γ-Al2O3-2	100	83.8674	80.1084	72.4673	80.9095	87.0717	1	0.96482	0.862947	0.948908	0.954843	0.995758	1	2.2502	2.28815	2.06689	2.40121	2.8336	4.5	4.68396	4.72744	4.66014	4.72744	4.77173
THP-1 cells were exposed to 0-200 μg/mL metal oxide particles for 24 h. Cell viability was determined by MTS assay. Pro-inflammatory effect indicated by IL-1β, IL-6, IL-2, TNF-α, and MCP-1 levels in supernatants were quantified by ELISA. Results were expressed as mean values of multiple determinations from three separate experiments.
Table S2-b Cellular events in BEAS-2B cells.
Metal oxide nanoparticles	a. Cell viability (%)						b. FCTGF-β						Metal oxide nanoparticles	c. FCDCF						d. FCATP						e. LDH release (%)
	MeONPs Concentration (μg/mL)						MeONPs Concentration (μg/mL)							MeONPs Concentration (μg/mL)						MeONPs Concentration (μg/mL)						MeONPs Concentration (μg/mL)
	0	12.5	25	50	100	200	0	12.5	25	50	100	200		0	12.5	25	50	100	200	0	12.5	25	50	100	200	0	12.5	25	50	100	200
Bi2O3	100	91.1474	88.8186	86.3274	86.2732	78.6911	1	1.07178	1.07965	1.1842	1.30518	1.26179	Sm2O3	1	0.740716	0.741818	0.56404	0.6209	0.679963	1	0.629293	0.501126	0.362236	0.181925	0.0833023	0	0.129725	0.164518	0.276095	0.391272	0.189113
CeO2-1	100	99.359	100.824	89.7436	95.696	75.0916	1	0.945541	0.940991	0.961092	1.33442	0.982957	Tm2O3	1	0.814766	0.725657	0.661965	0.580202	0.680037	1	0.56441	0.298336	0.232697	0.131217	0.0838251	0	0.207709	0.323486	0.355879	0.243702	-0.0892315
CeO2-2	100	91.5751	89.652	89.1026	86.8132	71.978	1	0.925315	1.04528	1.08455	1.06001	1.03034	MgO	1	1.08863	1.11045	0.993058	1.07445	1.10927	1	1.1264	0.940226	1.16472	1.08697	0.815844	0	0.00195021	-0.0628368	-0.00044931	0.0673371	0.217907
CeO2-3	100	81.1998	81.6201	73.4046	76.729	68.0168	1	1.02253	1.07145	1.10579	1.09077	1.11076	MoO3	1	1.04051	0.894839	0.799265	0.756584	0.592691	1	1.00255	0.785924	0.945728	0.888283	0.761188	0	-0.0562381	-0.0514391	0.0187468	0.0385429	0.136323
Co3O4-1	100	117.304	116.401	109.876	85.3808	95.52	1	1.05891	1.15688	1.19576	1.12405	1.18318	NiO-1	1	1.19551	1.15684	1.16009	2.09415	2.86092	1	1.05655	1.0142	0.975718	0.972132	0.920693	0	0.0286724	0.0225864	0.0311068	0.0256294	0.0797949
Co3O4-2	100	114.644	98.1134	90.8854	22.8887	17.2	1	0.945541	0.940991	0.961092	1.33442	0.982957	NiO-2	1	1.27954	1.22473	1.28871	1.43509	3.64755	1	0.81121	0.7853	0.827404	0.755857	0.681421	0	-0.0595748	0.00615418	-0.00966946	0.0365842	0.0463219
Co3O4-3	100	133.3	131.238	129.176	121.726	115.074	1	0.925315	1.04528	1.08455	1.06001	1.03034	Bi2O3	1	1.29902	1.20468	1.06584	0.877918	0.966054	1	0.981742	0.890142	0.852439	0.788358	0.834228	0	0.0158918	0.0724917	0.0591025	0.0633627	-0.111914
Co3O4-4	100	95.718	107.824	98.8443	99.0438	101.172	1	1.02253	1.07145	1.10579	1.09077	1.11076	SnO2	1	1.46011	1.13631	1.02125	0.890714	0.883934	1	0.815134	0.744663	0.713063	0.742286	0.652359	0	0.0390186	0.00493697	0.0268466	-0.0236673	0.0487563
Cr2O3	100	97.9597	97.9597	89.1617	67.2324	55.0202	1	1.01645	1.00865	1.0295	1.02113	1.02863	Er2O3	1	1.10479	1.00323	0.957853	0.947138	1.10665	1	0.905217	0.739531	0.659952	0.501635	0.312506	0	0.0973632	0.0695858	0.0905606	0.159721	0.173326
CuO-1	100	114.03	104.039	77.8031	46.4144	24.5446	1	1.05248	1.04504	1.04353	1.05671	1.05311	Gd(OH)3	1	1.1962	1.24999	1.11518	1.13355	1.21052	1	0.904924	0.975549	0.831712	0.865952	0.747345	0	0.0344389	0.0321713	0.0429422	0.0418084	0.053713
CuO-2	100	73.309	82.5233	57.5132	36.857	32.9081	1	1.05026	1.05069	1.10695	1.09942	1.25088	Yb2O3	1	1.31887	1.14328	1.15017	1.11452	1.04368	1	0.998529	0.983954	0.925346	0.599636	0.50277	0	0.0372733	0.000992617	0.0015595	-0.0024087	0.114937
CuO-3	100	84.1434	72.499	71.9927	47.1851	36.5533	1	0.970584	0.989984	0.970364	0.996841	1.00493	Eu(OH)3-2	1	1.23992	1.05462	0.942661	0.854558	0.941833	1	0.905766	0.283285	0.130113	0.105288	0.0736667	0	0.0494976	0.295361	0.301271	-0.0332447	-0.0893913
CuO-4	100	105.407	90.32	77.9668	47.0838	34.6294	1	1.07422	1.05051	1.09454	1.09943	1.14186	Tb2O3	1	1.05972	1.15003	1.11556	1.04565	0.650639	1	0.789857	0.68703	0.593133	0.623147	0.238251	0	0.0825946	0.0294031	-0.124852	0.165928	0.449616
Dy2O3	100	73.9943	81.8402	74.8235	42.2278	21.5604	1	1.45677	1.66539	1.96014	2.30361	3.51051	Fe2O3-1	1	0.893478	1.00644	0.917465	1.19356	0.954789	1	0.893558	0.836333	0.703682	0.652286	0.610559	0	0.150514	0.0629745	0.0617835	-0.131755	0.058806
Er2O3	100	97.0471	79.7708	60.9078	38.6954	37.9021	1	1.18456	1.42903	1.77581	2.66292	3.36514	Fe2O3-2	1	1.0572	1.2056	1.22979	1.10617	1.89037	1	1.05522	0.861221	0.871862	0.784757	0.646296	0	0.121334	0.0671431	0.0284353	-0.0311151	0.0236713
Eu2O3-1	100	104.09	86.9459	53.637	43.228	37.2275	1	2.34498	2.75061	3.47944	4.30462	4.13125	Fe2O3-3	1	1.01471	0.939163	1.21008	1.38754	1.68842	1	0.960448	0.889132	0.9225	0.756036	0.550482	0	0.0778621	0.0993003	-0.127587	-0.0745869	-0.0299241
Eu2O3-2	100	83.7619	40.6564	36.9826	39.7992	37.2888	1	0.952826	0.934755	0.99131	1.02787	1.03865	Fe2O3-4	1	1.20292	0.992212	1.01122	0.979074	1.10279	1	0.9436	0.814048	0.823055	0.76441	0.627739	0	0.0314128	0.0236713	0.0605925	0.154682	0.130862
Fe2O3-2	100	90.5	85.5	80.9167	79.5833	67.0833	1	1.064	0.954701	1.0959	1.04661	1.02916	α-MnO2-2	1	1.75346	2.05559	3.08548	4.85381	4.41733	1	0.636822	0.673234	0.659538	0.296065	0.212717	0	0.118644	0.0734463	0.0779661	0.380791	0.745763
Fe2O3-3	100	88.3333	87.1667	87.1667	79.5833	80.75	1	1.4196	1.5914	1.50947	1.57432	1.86503	β-MnO2-3	1	0.962715	1.21848	2.04422	1.54668	3.63463	1	0.646168	0.51977	0.383364	0.238782	0.152241	0	0.116384	0.132203	0.143503	0.255367	0.389831
Fe2O3-4	100	91.0833	84.8333	85	83.6667	85.3333	1	1.28771	1.11937	1.3406	1.24606	1.48929	Co3O4-1	1	0.800717	0.938223	1.0808	1.30613	2.07763	1	1.44334	1.24642	1.17229	0.96892	0.624264	0	-0.020339	-0.0519774	-0.0858757	0.0847458	0.131073
Gd2O3	100	97.7235	96.065	98.5527	35.7852	22.581	1	0.962955	0.96596	1.00759	1.10037	1.22347	Co3O4-5	1	0.873844	1.11492	1.22985	1.40917	1.98141	1	1.21382	1.25717	1.13514	0.965696	0.73766	0	-0.511864	0.0361582	-0.0677966	0.0237288	0.152542
In2O3-1	100	101.688	103.887	109.003	111.355	111.1	1	1.5442	1.59534	1.46551	1.40204	1.63652	CeO2-1	1	0.838377	0.902056	0.922214	0.874549	0.753409	1	0.877267	0.855771	0.797884	0.713642	0.562819	0	0.0092149	-0.0562109	-0.160339	0.0175083	0.0285662
In2O3-2	100	90.2813	101.381	96.3683	99.9488	102.967	1	1.41769	1.44032	1.37504	1.54577	1.92776	CeO2-2	1	0.947648	0.917693	0.98043	0.882651	0.806161	1	0.913889	0.844655	0.827185	0.805543	0.572057	0	-0.0165868	-0.0147438	-0.0875415	-0.0847771	-0.0119794
La2O3	100	136.264	128.682	128.534	121.838	120.304	1	0.954115	1.09139	1.24076	1.19169	1.313	CeO2-3	1	1.05409	1.35421	1.35817	1.69013	1.4844	1	0.780279	0.684013	0.605983	0.517349	0.243697	0	-0.00645043	-0.117029	-0.00737192	-0.0377811	-0.273683
MgO	100	103.622	98.3504	124.707	113.659	112.504	1	3.23546	3.63407	3.17754	2.67299	2.37717	Nd(OH)3	1	0.797579	0.855467	0.801362	0.808362	0.695422	1	0.764298	0.787237	0.70436	0.50431	0.191275	0	0.170687	0.13196	0.154909	0.428872	0.725784
MoO3	100	79.1241	83.5523	71.3382	69.5377	65.6448	1	0.949456	0.964536	1.05166	1.11346	1.12704	Eu(OH)3-1	1	0.880628	0.722474	0.802119	0.936625	1.17329	1	0.51441	0.184691	0.0904337	0.0564359	0.0343194	0	0.3758	0.573742	-0.0286886	-0.0588101	-0.0229512
Nd2O3	100	101.551	95.746	97.851	67.3603	48.7979	1	1.09779	1.14352	1.19853	1.41076	1.21197	La2O3	1	0.678396	0.764283	0.789065	0.806092	0.912032	1	0.39137	0.335967	0.241785	0.14069	0.0913464	0	0.166384	0.426003	0.372932	0.352851	0.117616
NiO-1	100	112.185	108.269	109.173	103.903	89.2959	1	0.97452	0.972549	1.03385	1.03248	1.05758	Cr2O3	1	1.02876	1.1625	1.23685	1.26258	1.24196	1	0.951375	1.00388	0.927942	0.789834	0.284035	0	-0.140569	0.081757	0.123353	0.106141	0.0530698
NiO-2	100	100.456	94.4994	99.7866	110.093	93.7632	1	1.04322	1.05292	1.02937	1.03527	1.06425	CuO-1	1	2.02067	1.76241	1.48597	1.09688	0.813678	1	0.917517	0.796853	0.741936	0.623052	0.242184	0	0.0296451	0.0143986	0.0398095	0.203286	0.0398095
Sb2O3	100	102.864	99.7442	114.783	113.555	109.923	1	1.05279	1.23215	1.11555	1.04081	1.24858	CuO-3	1	1.34225	1.56712	1.59671	1.1307	0.749429	1	0.988952	0.946327	0.82779	0.656341	0.377743	0	-0.0745393	-0.0169414	-0.0254117	0.0279511	0.155005
Sm2O3	100	100	100.183	98.0769	94.1392	86.1722	1	1.32271	1.35477	1.54565	1.74957	1.93117	ZnO-1	1	0.455764	0.520925	0.517988	0.651615	0.664464	1	0.0593602	0.0504675	0.025866	0.0237071	0.0262053	0	0.0536619	-0.00926411	-0.0665967	-0.0428247	-0.0679951
SnO2	100	104.757	106.138	100	103.171	115.192	1	1.10004	1.23369	1.18106	1.07773	1.16228	ZnO-2	1	0.449064	0.425661	0.544328	0.474394	0.414648	1	0.0668651	0.0430758	0.0375037	0.0286726	0.0283334	0	0.0270932	-0.020451	-0.00786576	-0.0106625	-0.104352
Tb2O3	100	109.153	123.47	124.296	133.343	132.674	1	1.28134	1.26919	1.27328	1.27219	1.29962	ZnO-3	1	0.514868	0.455764	0.491924	0.585169	0.562408	1	0.0830879	0.0533666	0.0506834	0.0446076	0.0411738	0	0.0270932	-0.0120608	0.0354833	-0.059605	-0.0624017
TiO2-a-1	100	94.8347	95.2996	96.1777	95.5579	89.7727	1	1.01441	1.01877	1.14271	1.09168	1.12349	TiO2-a-1	1	2.8091	3.58829	9.31351	14.6768	15.1463	1	1.41814	1.0766	0.800726	0.756303	0.329339	0	-0.0428247	-0.0903688	-0.0679951	-0.121133	-0.205034
TiO2-a-2	100	89.5145	85.2789	79.9587	73.2955	71.0744	1	1.05891	1.15688	1.19576	1.12405	1.18318	TiO2-a-2	1	2.10601	4.01906	6.7639	14.6675	18.8007	1	3.35803	2.81097	2.32048	2.11278	1.57939	0	0.0152378	-0.0680794	-0.0958517	-0.0541932	-0.00327714
TiO2-a-3	100	112.165	103.893	99.9513	112.506	105.499	1	1.12823	1.19903	1.13031	1.1338	1.0151	TiO2-a-3	1	1.37285	2.12465	1.99792	2.588	3.62251	1	3.28161	3.47092	2.68719	2.31649	1.78115	0	-0.0727081	-0.105109	-0.0958517	-0.118995	0.0183236
TiO2-r-1	100	90.4136	92.8954	95.6204	96.983	90.0243	1	1.83622	2.00701	2.0213	1.96063	2.07055	TiO2-r-1	1	2.29927	3.78623	7.00675	8.65773	15.8503	1	3.22226	2.67672	2.21384	1.93537	1.22583	0	0.0306669	-0.0248779	-0.0418499	0.0214094	-0.0526503
TiO2-r-2	100	95.4745	91.6788	89.9757	84.4769	74.9878	1	2.11819	2.14982	2.08588	1.71424	2.08875	TiO2-r-2	1	1.61456	1.89871	2.26916	2.42026	2.80505	1	1.82384	1.41563	1.37537	1.31836	1.38936	0	0.063068	0.0522676	0.0769542	0.151014	0.280618
Tm2O3	100	101.876	112.181	108.248	106.36	105.573	1	1.005	1.03776	1.09106	1.04955	1.02792	α-Al2O3	1	0.987719	0.972368	1.24384	1.39573	1.34443	1	1.14523	1.3343	1.14846	1.06313	1.27846	0	0.110146	0.059703	0.0723138	0.0754665	0.152708
Y2O3	100	106.909	86.3692	61.7469	47.9687	48.6066	1	1.30952	1.29818	1.41514	1.47248	1.49767	γ-Al2O3-1	1	1.02233	1.13894	1.26148	1.3614	1.59732	1	1.07542	1.2493	1.57706	1.45393	1.40519	0	0.0754665	0.0407867	0.0502448	0.0171413	0.0439394
Yb2O3	100	86.0024	79.9909	72.2464	63.3103	56.2157	1	1.04974	1.00591	1.08583	1.02051	1.07195	γ-Al2O3-2	1	1.02071	1.15214	1.31992	1.2227	1.26229	1	1.10971	1.24892	1.39683	1.54847	1.27227	0	0.127486	0.0959592	0.0250231	-0.0474893	-0.104238
ZnO-1	100	19.5246	18.3188	17.113	17.0667	16.8348	1	1.00351	0.998266	1.02589	0.990624	1.02478	In2O3-1	1	0.976408	0.987719	1.07094	1.19213	1.43371	1	1.05189	1.05399	1.14008	1.07905	1.14704	0	0.132215	0.0329049	0.0691611	0.119605	0.157437
ZnO-2	100	20.4058	19.2	18.0406	17.113	16.9739	1	1.05814	1.05469	1.0031	1.01439	1.05312	In2O3-2	1	1.5068	1.4602	1.64078	1.78884	1.7403	1	2.04686	1.82186	1.60775	1.40169	1.20645	0	-0.0410206	-0.0381418	-0.0683686	-0.0136726	0.0669321
ZnO-3	100	21.8898	18.0406	17.6232	17.8551	17.8087	1	0.961609	0.974058	0.982902	1.00288	0.993102	Dy2O3	1	1.00146	1.05219	1.06165	1.08326	1.18957	1	1.14384	1.03139	0.862796	0.85047	0.346655	0	-0.0223088	-0.0395812	0.00791797	0.0582959	0.0525384
α-Al2O3	100	81.4376	85.8434	70.5391	83.4782	84.0811	1	1.10286	0.993196	1.41906	1.39409	1.52334	Y2O3	1	1.21505	1.34563	1.31651	1.33398	1.66797	1	0.85436	0.812099	0.421307	0.192377	0.144312	0	0.0525384	0.023751	-0.13458	-0.215184	-0.167685
α-MnO2-1	100	35.4546	30.7273	28.3637	37.8182	26.7879	1	0.994498	1.10873	1.12614	1.22906	1.36284	Sb2O3	1	0.960439	0.990779	1.07112	1.21675	1.56772	1	2.09754	1.64181	1.43908	1.30506	1.16375	0	0.0467809	0.0870832	0.112992	0.0928407	0.137461
α-MnO2-2	100	38.0808	35.5859	27.4445	25.7374	24.8182	1	0.914303	0.902687	0.931789	0.926846	0.911952
α-MnO2-3	100	41.8889	32.5657	27.0505	26	22.0606	1	0.992773	0.942419	1.04054	1.00918	1.08038
γ-Al2O3-1	100	98.8636	102.479	106.25	103.977	100.568	1	0.987654	1.07772	1.05052	1.10828	1.2599
γ-Al2O3-2	100	91.4773	79.8554	88.5331	84.0393	85.2789	1	0.978988	0.9751	0.989489	0.971279	0.948788
Cell viability determined by MTS assay on THP-1 cells exposed to 0-200 μg/mL metal oxide particles for 24 h.
Results were expressed as mean values of multiple determinations from three separate experiments.
[truncated: 12 more columns]

## Sheet: Table S3
Table S3 Lung fibrosis reflected by FCTGF-β (fold change of TGF-β productionin BALF).
NO.	Metal oxide nanoparticles	FCTGF-β in BALF				Collagen deposition levels
		A	B	C	D	A	B	C	D
1	CeO2-1	0.769257	0.445334	1.48205	1.64828	0	1	0	0
2	CeO2-2	1.70544	1.65861	1.62258	2.73283	0	0	0	5
3	CeO2-3	0.552419	0.682015	0.500983	0.445334	0	0	0	0
4	Co3O4-1	0.852896	1.06453	0.747055	—	0	0	0	1
5	Co3O4-2	1.10028	0.850821	1.12423	—	0	0	0
6	Co3O4-3	1.99506	1.47502	1.92615	—	1	0	0
7	Co3O4-4	0.386257	0.394934	0.341082	0.321902	0	0	0	0
8	Co3O4-5	0.424328	0.612502	0.513668	0.520054	0	0	0	0
9	α-MnO2-1	3.21295	1.89866	3.13617	3.44128	4	0	7	4
10	α-MnO2-2	1.45267	1.06453	1.58692	0.856781	0	0	0	1
11	α-MnO2-3	0.646896	0.445334	1.22253	1.87673	1	0	0	0
12	Eu2O3-1	0.163002	0.578832	0.207077	0.383379	0	0	1	1
13	Eu2O3-2	1.45267	1.16439	1.31903	—	0	0	0
14	Cr2O3	0.299512	0.294422	0.208935	0.191386	0	0	0	0
15	Gd2O3	0.668968	0.254052	0.385462	—	0	0	0
16	Er2O3	0.564063	0.511056	0.580638	0.600369	0	0	0	0
17	Nd2O3	0.939582	0.495827	0.435718	0.317039	0	0	0	1
18	La2O3	0.212472	0.217308	0.207774	0.210105	0	0	0	0
19	CuO-1	0.721483	1.54158	0.619323	1.72645	0	0	0	0
20	CuO-2	2.59148	1.11181	1.49683	0.349411	5	0	0	0
21	CuO-3	3.13617	2.27131	2.92452	4.41247	6	6	5	6
22	CuO-4	2.24156	1.83321	1.93732	10.1087	6	0	0	7
23	Fe2O3-1	0.763479	0.485847	0.580638	0.662097	0	0	0	0
24	Fe2O3-2	0.939582	0.89535	13.0171	0.770109	0	0	5	0
25	Fe2O3-3	2.1261	1.14144	2.10269	2.13197	5	0	6	5
26	Fe2O3-4	5.57323	6.34518	4.53302	5.99801	6	6	4	5
27	TiO2-r-1	12.3111	13.0171	8.98042	11.7522	7	6	7	7
28	TiO2-r-2	5.72942	7.87983	5.14578	5.99801	6	6	6	5
29	TiO2-a-1	2.94114	2.83763	3.90346	3.19023	5	6	6	5
30	TiO2-a-2	2.73606	2.76295	2.35538	4.93406	5	5	5	7
31	TiO2-a-3	7.93777	7.15729	6.57514	5.04395	7	7	5	7
32	α-Al2O3	4.01729	7.15729	6.58569	6.19079	7	6	4	7
33	γ-Al2O3-1	6.63858	5.50559	5.99801	7.05851	6	7	7	4
34	γ-Al2O3-2	7.26785	6.88464	7.86827	8.98042	7	6	5	7
35	Dy2O3	11.3868	9.31728	8.23069	7.81059	7	7	6	7
36	NiO-1	3.46505	2.16147	2.57758	4.93406	6	6	5	5
37	NiO-2	1.14144	1.64811	2.83763	2.64301	0	0	5	6
38	In2O3-1	6.72703	5.70628	4.744	4.94363	7	7	6	6
39	In2O3-2	3.53201	4.48964	4.57414	4.80799	7	5	5	6
40	Tm2O3	3.83095	2.93268	4.0232	4.0508	5	7	6	7
41	Tb2O3	2.68451	2.81476	2.26675	2.50995	4	6	5	4
42	Bi2O3	7.06524	8.44081	9.83512	8.50552	7	7	6	7
43	Sm2O3	8.46506	8.67599	6.66596	7.5327	7	7	7	5
44	Y2O3	4.21009	4.85788	6.25708	4.63063	7	7	7	4
45	Yb2O3	5.05122	5.62534	6.66596	7.5327	5	7	5	5
46	MgO	2.31134	3.09753	2.06421	2.92611	1	1	1	1
47	MoO3	2.20958	2.08941	2.93268	1.94492	1	1	1	1
48	Sb2O3	4.09225	4.2379	3.68099	4.57414	7	4	7	6
49	SnO2	2.42643	2.67153	3.04464	3.45789	4	5	4	5
50	ZnO-1	5.48611	6.09965	6.69648	6.69648	7	6	5	6
51	ZnO-2	2.7105	1.98878	2.48422	2.63264	1	2	1	1
52	ZnO-3	2.99188	2.29222	2.74303	3.04464	2	1	1	1
53	Quartz	4.67308	5.34035	4.16843	4.666	2	2	2	2
	: Data points labled as fibrogenic potential (FCTGF-β ≥ 2).
	: Data points labled as non-fibrogenic potential (FCTGF-β＜2).
MeONPs were oropharyngeally administrated at 2 mg/kg. n = 4 mice in each group (A, B, C, and D). Animals received 2 mg/kg quartz exposure were used as positive control. After 3 months, animals were killed to collect BALF for cytokine measurements.

## Sheet: Table S4
Table S4 Performance of the machine learning models on the training set and test set.
Algorithm	Data set	n	P	N	ACC	MCC	SE	SP	AUC	F1
Random forest (RF)	Training set	156	91	65	0.89	0.78	0.91	0.86	0.94	0.89
	Test set	47	28	19	0.84	0.68	0.8	1	0.85	0.89
C4.5 decision tree (C4.5)	Training set	156	91	65	0.9	0.79	0.91	0.88	0.9	0.89
	Test set	47	28	19	0.74	0.51	0.7	1	0.61	0.82
Support vector machine (SVM) puk kernel	Training set	156	91	65	0.85	0.7	0.84	0.88	0.84	0.86
	Test set	47	28	19	0.76	0.52	0.86	0.65	0.79	0.74
Bayesnet	Training set	156	91	65	0.86	0.71	0.88	0.83	0.9	0.85
	Test set	47	28	19	0.74	0.51	0.7	1	0.71	0.82
Locally Weighted Learning (LWL)	Training set	156	91	65	0.92	0.83	0.91	0.92	0.81	0.92
	Test set	47	28	19	0.74	0.51	0.7	1	0.36	0.82
k nearest neighbour (k-NN)	Training set	156	91	65	0.86	0.71	0.89	0.82	0.91	0.85
	Test set	47	28	19	0.66	0.48	1	0.54	0.81	0.7
Decision table (DT)	Training set	156	94	78	0.88	0.75	0.91	0.84	0.89	0.87
	Test set	47	32	19	0.66	0.48	1	0.54	0.71	0.7
Logistic regression (LGR)	Training set	156	94	78	0.83	0.66	0.84	0.82	0.87	0.83
	Test set	47	32	19	0.49	0.08	0.67	0.43	0.82	0.52
*TP means true positive; FP means false positive; TN means true negative; FN means false negative; n means the number of data points in the dataset; P and N mean the number of positive and negative data points, respectively. The predictive accuracies were measured by six indices, namely, overall predictive accuracy (ACC = [TP + TN]/[TP + FP + TN + FN]), Matthews correlation coefficient (MCC= (TP×…

## Sheet: Table S5
Table S5 Experimental versus predicted results of lung fibrosis by the models
NO.	Metal oxide nanoparticles	Descriptors							Experimental results of lung fibrosis				Predicted results of lung fibrosis
		Cell viability (%) of THP-1cell at the concentration of 200 μg/mL	FC Il-1β of THP-1cell at the concentration of 12.5 μg/mL	Cell viability (%) of BEAS-2B cell at the concentration of 25 μg/mL	FC TGF-β of BEAS-2B cell at the concentration of 25 μg/mL	Hydrodynamic size (nm)	Zeta-potential (mV)	Dissociation degree in PSF solution (%)	TGF-β (pg/ml)	FCTGF-β	Experimental results of FCTGF-β	Experimental results of collagen staining
1	Pr2O3-a	94.85	1.25	—	—	554.6	-2.26	0	44.23	0.29	NO	NO	NO
2	Pr2O3-b	94.85	1.25	—	—	554.6	-2.26	0	87.89	0.58	NO	NO	NO
3	Pr2O3-c	94.85	1.25	—	—	554.6	-2.26	0	39.88	0.26	NO	NO	NO
4	Pr2O3-d	94.85	1.25	—	—	554.6	-2.26	0	105.41	0.69	NO	NO	NO
5	ZrO2-a	82.17	1.79	106.8	1.02	—	—	—	585.48	3.83	YES	YES	YES
6	ZrO2-b	82.17	1.79	106.8	1.02	—	—	—	682.93	4.47	YES	YES	YES
7	ZrO2-c	82.17	1.79	106.8	1.02	—	—	—	637.06	4.17	YES	YES	YES
8	ZrO2-d	82.17	1.79	106.8	1.02	—	—	—	697.99	4.57	YES	YES	YES
9	Co3O4-6-a	34.55	8.56	109.75	1.44	209.3	34.4	0	41.91	0.27	NO	NO	NO
10	Co3O4-6-b	34.55	8.56	109.75	1.44	209.3	34.4	0	102.07	0.67	NO	NO	NO
11	Co3O4-6-c	34.55	8.56	109.75	1.44	209.3	34.4	0	101	0.66	NO	NO	NO
12	Co3O4-6-d	34.55	8.56	109.75	1.44	209.3	34.4	0	156.88	1.03	NO	NO	NO
13	Ho2O3-a	91.29	1.14	83.38	0.94	835.8	0.1	0	154.33	1.01	NO	NO	NO
14	Ho2O3-b	91.29	1.14	83.38	0.94	835.8	0.1	0	76.08	0.5	NO	NO	NO
15	Ho2O3-c	91.29	1.14	83.38	0.94	835.8	0.1	0	55.54	0.36	NO	NO	NO
16	Ho2O3-d	91.29	1.14	83.38	0.94	835.8	0.1	0	122.73	0.8	NO	NO	NO
17	CuO-5-a	28.15	17.8	78.01	1.05	242.6	-23.7	0.36	539.31	3.53	YES	NO	NO
18	CuO-5-b	28.15	17.8	78.01	1.05	242.6	-23.7	0.36	230.27	1.51	NO	NO	NO
19	CuO-5-c	28.15	17.8	78.01	1.05	242.6	-23.7	0.36	321.14	2.1	YES	NO	NO
20	CuO-5-d	28.15	17.8	78.01	1.05	242.6	-23.7	0.36	2005.71	13.12	YES	NO	NO
The selected five MeONPs were exposed to 20 mice, n = 4 (a, b, c, and d) for 90 days. The fibrosis were reflected by determining FCTGF-β and collagen staining image of lung tissues.
Production of IL-1β and TGF-β were expressed as the fold changes (FCIL-1β/TGF-β)

## Sheet: Table S6
Table S6 Applicability domain characterization for the model
	Training Set							Test set								Experimental validation set
	Standardized values of descriptors							Standardized values of descriptors								Standardized values of descriptors
Datapoints of metal oxide nanoparticles	Cell viability (%) of THP-1cell at the concentration of 200 μg/mL	FC Il-1β of THP-1cell at the concentration of 12.5 μg/mL	Cell viability (%) of BEAS-2B cell at the concentration of 25 μg/mL	FC TGF-β of BEAS-2B cell at the concentration of 25 μg/mL	Hydrodynamic size (nm)	Zeta-potential (mV)	Dissociation degree in PSF solution (%)	Datapoints of metal oxide nanoparticles	Cell viability (%) of THP-1cell at the concentration of 200 μg/mL	FC Il-1β of THP-1cell at the concentration of 12.5 μg/mL	Cell viability (%) of BEAS-2B cell at the concentration of 25 μg/mL	FC TGF-β of BEAS-2B cell at the concentration of 25 μg/mL	Hydrodynamic size (nm)	Zeta-potential (mV)	Dissociation degree in PSF solution (%)	Datapoints of metal oxide nanoparticles	Cell viability (%) of THP-1cell at the concentration of 200 μg/mL	FC Il-1β of THP-1cell at the concentration of 12.5 μg/mL	Cell viability (%) of BEAS-2B cell at the concentration of 25 μg/mL	FC TGF-β of BEAS-2B cell at the concentration of 25 μg/mL	Hydrodynamic size (nm)	Zeta-potential (mV)	Dissociation degree in PSF solution (%)
CeO2-1-a	0.641602	0.110767	0.220254	-0.491946	-0.842085	2.05385	-0.588947	Cr2O3-a	-0.210884	-0.621042	0.200207	2.04393	-0.290985	-0.470993	-0.548931	Pr2O3-a	0.741894	-0.600992	1.40307	-0.612225	-0.461325	-0.440936	-0.588947
CeO2-1-b	0.641602	0.110767	0.220254	-0.491946	-0.842085	2.05385	-0.588947	Cr2O3-b	-0.210884	-0.621042	0.200207	2.04393	-0.290985	-0.470993	-0.548931	Pr2O3-b	0.741894	-0.600992	1.16249	-0.592178	-0.461325	-0.440936	-0.588947
CeO2-1-c	0.641602	0.110767	0.220254	-0.491946	-0.842085	2.05385	-0.588947	Cr2O3-c	-0.210884	-0.621042	0.200207	2.04393	-0.290985	-0.470993	-0.548931	Pr2O3-c	0.741894	-0.600992	0.921922	-0.582155	-0.461325	-0.440936	-0.588947
CeO2-1-d	0.641602	0.110767	0.220254	-0.491946	-0.842085	2.05385	-0.588947	Cr2O3-d	-0.210884	-0.621042	0.200207	2.04393	-0.290985	-0.470993	-0.548931	Pr2O3-d	0.741894	-0.600992	0.68135	-0.562109	-0.461325	-0.440936	-0.588947
CeO2-2-a	0.501192	-0.72129	0.200207	-0.121088	-0.771945	1.86349	-0.588947	Er2O3-a	0.230403	-0.580943	-1.67425	-0.101041	0.350296	-0.440936	-0.548931	ZrO2-a	0.330695	-0.440596	0.871803	-0.371668	-0.992385	1.53285	-0.548931
CeO2-2-b	0.501192	-0.72129	0.200207	-0.121088	-0.771945	1.86349	-0.588947	Er2O3-b	0.230403	-0.580943	-1.67425	-0.101041	0.350296	-0.440936	-0.548931	ZrO2-b	0.330695	-0.440596	0.871803	-0.371668	-0.992385	1.53285	-0.548931
CeO2-2-c	0.501192	-0.72129	0.200207	-0.121088	-0.771945	1.86349	-0.588947	Er2O3-c	0.230403	-0.580943	-1.67425	-0.101041	0.350296	-0.440936	-0.548931	ZrO2-c	0.330695	-0.440596	0.871803	-0.371668	-0.992385	1.53285	-0.548931
CeO2-2-d	0.501192	-0.72129	0.200207	-0.121088	-0.771945	1.86349	-0.588947	Er2O3-d	0.230403	-0.580943	-1.67425	-0.101041	0.350296	-0.440936	-0.548931	ZrO2-d	0.330695	-0.440596	0.871803	-0.371668	-0.992385	1.53285	-0.548931
CeO2-3-a	-0.150708	1.89518	-0.381175	1.18193	1.28216	0.0900832	-0.468897	Nd(OH)3-a	0.410929	-0.230075	0.520969	-0.562109	-0.140685	-1.42282	-0.548931	Co3O4-6-a	-1.19375	1.51424	0.992089	1.18193	-0.972345	1.59297	-0.588947
CeO2-3-a	-0.150708	1.89518	-0.381175	1.18193	1.28216	0.0900832	-0.468897	Nd(OH)3-b	0.410929	-0.230075	0.520969	-0.562109	-0.140685	-1.42282	-0.548931	Co3O4-6-b	-1.19375	1.51424	0.992089	1.18193	-0.972345	1.59297	-0.588947
CeO2-3-a	-0.150708	1.89518	-0.381175	1.18193	1.28216	0.0900832	-0.468897	Nd(OH)3-c	0.410929	-0.230075	0.520969	-0.562109	-0.140685	-1.42282	-0.548931	Co3O4-6-c	-1.19375	1.51424	0.992089	1.18193	-0.972345	1.59297	-0.588947
CeO2-3-a	-0.150708	1.89518	-0.381175	1.18193	1.28216	0.0900832	-0.468897	Nd(OH)3-d	0.410929	-0.230075	0.520969	-0.562109	-0.140685	-1.42282	-0.548931	Co3O4-6-d	-1.19375	1.51424	0.992089	1.18193	-0.972345	1.59297	-0.588947
Co3O4-1-a	-1.39433	2.90768	0.962017	1.07167	0.380356	-1.06213	-0.588947	Co3O4-3-a	-1.34419	1.37389	1.66368	-0.181227	-0.0805645	-0.971955	-0.588947	Ho2O3-a	0.621543	-0.631067	-0.220794	-0.451853	-0.0404844	-0.310686	-0.588947
Co3O4-1-b	-1.39433	2.90768	0.962017	1.07167	0.380356	-1.06213	-0.588947	Co3O4-3-b	-1.34419	1.37389	1.66368	-0.181227	-0.0805645	-0.971955	-0.588947	Ho2O3-b	0.621543	-0.631067	-0.220794	-0.451853	-0.0404844	-0.310686	-0.588947
Co3O4-1-c	-1.39433	2.90768	0.962017	1.07167	0.380356	-1.06213	-0.588947	Co3O4-3-c	-1.34419	1.37389	1.66368	-0.181227	-0.0805645	-0.971955	-0.588947	Ho2O3-c	0.621543	-0.631067	-0.220794	-0.451853	-0.0404844	-0.310686	-0.588947
Co3O4-1-d	-1.82559	0.100742	0.360588	0.62063	0.420436	-0.781589	-0.588947	Co3O4-4-a	-1.15363	0.531808	0.55104	0.530421	0.310216	-0.64132	-0.588947	Ho2O3-d	0.621543	-0.631067	-0.220794	-0.451853	-0.0404844	-0.310686	-0.588947
Co3O4-5-a	-1.82559	0.100742	0.360588	0.62063	0.420436	-0.781589	-0.588947	Co3O4-4-b	-1.15363	0.531808	0.55104	0.530421	0.310216	-0.64132	-0.588947	CuO-5-a	-1.39433	4.1708	-0.55158	-0.121088	-0.922245	-1.63322	0.861663
Co3O4-5-b	-1.82559	0.100742	0.360588	0.62063	0.420436	-0.781589	-0.588947	Co3O4-4-c	-1.15363	0.531808	0.55104	0.530421	0.310216	-0.64132	-0.588947	CuO-5-b	-1.39433	4.1708	-0.55158	-0.121088	-0.922245	-1.63322	0.861663
Co3O4-5-c	-1.82559	0.100742	0.360588	0.62063	0.420436	-0.781589	-0.588947	Co3O4-4-d	-1.15363	0.531808	0.55104	0.530421	0.310216	-0.64132	-0.588947	CuO-5-c	-1.39433	4.1708	-0.55158	-0.121088	-0.922245	-1.63322	0.861663
α-MnO2-2-a	-1.01322	0.110767	-2.02508	4.21896	1.703	0.150199	-0.348846	CuO-3-a	-1.1436	0.0806927	-0.431294	-0.542062	0.350296	-1.04209	2.23224	CuO-5-d	-1.39433	4.1708	-0.55158	-0.121088	-0.922245	-1.63322	0.861663
α-MnO2-2-b	-1.01322	0.110767	-2.02508	4.21896	1.703	0.150199	-0.348846	CuO-3-b	-1.1436	0.0806927	-0.431294	-0.542062	0.350296	-1.04209	2.23224
α-MnO2-2-c	-1.01322	0.110767	-2.02508	4.21896	1.703	0.150199	-0.348846	CuO-3-c	-1.1436	0.0806927	-0.431294	-0.542062	0.350296	-1.04209	2.23224
α-MnO2-2-d	-1.01322	0.110767	-2.02508	4.21896	1.703	0.150199	-0.348846	CuO-3-d	-1.1436	0.0806927	-0.431294	-0.542062	0.350296	-1.04209	2.23224
α-MnO2-3-a	-1.45451	0.100742	-2.05515	3.94834	3.91742	-0.38082	-0.108745	TiO2-r-2-a	0.380841	-0.651116	0.230278	-0.391714	-0.671745	0.0299678	-0.268813
α-MnO2-3-b	-1.45451	0.100742	-2.05515	3.94834	3.91742	-0.38082	-0.108745	TiO2-r-2-b	0.380841	-0.651116	0.230278	-0.391714	-0.671745	0.0299678	-0.268813
α-MnO2-3-c	-1.45451	0.100742	-2.05515	3.94834	3.91742	-0.38082	-0.108745	TiO2-r-2-c	0.380841	-0.651116	0.230278	-0.391714	-0.671745	0.0299678	-0.268813
α-MnO2-3-d	-1.45451	0.100742	-2.05515	3.94834	3.91742	-0.38082	-0.108745	TiO2-r-2-d	0.380841	-0.651116	0.230278	-0.391714	-0.671745	0.0299678	-0.268813
Eu2O3-1-a	0.0498764	2.74728	-1.10289	1.45256	-0.431265	-0.0602052	0.181377	γ-Al2O3-1-a	0.721835	-0.600992	0.821684	-0.642294	-0.641685	1.41262	-0.268813
Eu2O3-1-b	0.0498764	2.74728	-1.10289	1.45256	-0.431265	-0.0602052	0.181377	γ-Al2O3-1-b	0.721835	-0.600992	0.821684	-0.642294	-0.641685	1.41262	-0.268813
Eu2O3-1-c	0.0498764	2.74728	-1.10289	1.45256	-0.431265	-0.0602052	0.181377	γ-Al2O3-1-c	0.721835	-0.600992	0.821684	-0.642294	-0.641685	1.41262	-0.268813
Eu2O3-1-d	0.0498764	2.74728	-1.10289	1.45256	-0.431265	-0.0602052	0.181377	γ-Al2O3-1-d	0.721835	-0.600992	0.821684	-0.642294	-0.641685	1.41262	-0.268813
Eu2O3-2-a	0.320666	1.18342	-1.71434	1.49265	0.250096	-0.601243	-0.30883	γ-Al2O3-2-a	0.491163	-0.310274	0.180159	-0.542062	-0.842085	1.42264	-0.42888
Eu2O3-2-b	0.320666	1.18342	-1.71434	1.49265	0.250096	-0.601243	-0.30883	γ-Al2O3-2-b	0.491163	-0.310274	0.180159	-0.542062	-0.842085	1.42264	-0.42888
Eu2O3-2-c	0.320666	1.18342	-1.71434	1.49265	0.250096	-0.601243	-0.30883	γ-Al2O3-2-c	0.491163	-0.310274	0.180159	-0.542062	-0.842085	1.42264	-0.42888
CuO-1-a	-1.68518	0.571907	-0.21077	-0.642294	-0.822045	-1.60317	0.661579	γ-Al2O3-2-d	0.491163	-0.310274	0.180159	-0.542062	-0.842085	1.42264	-0.42888
CuO-1-b	-1.68518	0.571907	-0.21077	-0.642294	-0.822045	-1.60317	0.661579	Y2O3-a	0.651631	-0.390472	-0.802175	-0.532039	-0.681765	1.57293	-0.508914
CuO-1-c	-1.68518	0.571907	-0.21077	-0.642294	-0.822045	-1.60317	0.661579	Y2O3-b	0.651631	-0.390472	-0.802175	-0.532039	-0.681765	1.57293	-0.508914
CuO-1-d	-1.68518	0.571907	-0.21077	-0.642294	-0.822045	-1.60317	0.661579	Y2O3-c	0.651631	-0.390472	-0.802175	-0.532039	-0.681765	1.57293	-0.508914
CuO-2-a	-1.56483	0.331312	-0.962556	-0.602202	-0.551505	-0.741513	3.19264	Y2O3-d	0.651631	-0.390472	-0.802175	-0.532039	-0.681765	1.57293	-0.508914
CuO-2-b	-1.56483	0.331312	-0.962556	-0.602202	-0.551505	-0.741513	3.19264	ZnO-1-a	-1.83562	-0.711265	-2.43606	-0.351621	3.67694	-0.140359	2.43232
CuO-2-c	-1.56483	0.331312	-0.962556	-0.602202	-0.551505	-0.741513	3.19264	ZnO-1-b	-1.83562	-0.711265	-2.43606	-0.351621	3.67694	-0.140359	2.43232
CuO-2-d	-1.56483	0.331312	-0.962556	-0.602202	-0.551505	-0.741513	3.19264	ZnO-1-c	-1.83562	-0.711265	-2.43606	-0.351621	3.67694	-0.140359	2.43232
CuO-4-a	-1.69521	0.371411	-0.21077	-0.511993	0.370336	-1.06213	2.11219	ZnO-1-d	-1.83562	-0.711265	-2.43606	-0.351621	3.67694	-0.140359	2.43232
CuO-4-b	-1.69521	0.371411	-0.21077	-0.511993	0.370336	-1.06213	2.11219	SnO2-a	0.601485	-0.801488	0.60116	-0.542062	1.08176	-1.05211	-0.548931
CuO-4-c	-1.69521	0.371411	-0.21077	-0.511993	0.370336	-1.06213	2.11219	SnO2-b	0.601485	-0.801488	0.60116	-0.542062	1.08176	-1.05211	-0.548931
CuO-4-d	-1.69521	0.371411	-0.21077	-0.511993	0.370336	-1.06213	2.11219	SnO2-c	0.601485	-0.801488	0.60116	-0.542062	1.08176	-1.05211	-0.548931
Fe2O3-1-a	0.631572	-0.641092	-0.190722	-0.481923	-0.761925	-0.491032	-0.588947	SnO2-d	0.601485	-0.801488	0.60116	-0.542062	1.08176	-1.05211	-0.548931
Fe2O3-1-b	0.631572	-0.651116	-0.170675	-0.511993	-0.761925	-0.491032	-0.588947
Fe2O3-1-c	0.641602	-0.671166	-0.150627	-0.542062	-0.761925	-0.491032	-0.588947
Fe2O3-1-d	0.651631	-0.681191	-0.120556	-0.572132	-0.761925	-0.491032	-0.588947
Fe2O3-2-a	0.651631	-0.70124	-0.100508	-0.602202	-0.882165	-0.721474	-0.588947
Fe2O3-2-b	0.651631	-0.70124	-0.100508	-0.602202	-0.882165	-0.721474	-0.588947
Fe2O3-2-c	0.651631	-0.70124	-0.100508	-0.602202	-0.882165	-0.721474	-0.588947
Fe2O3-2-d	0.651631	-0.70124	-0.100508	-0.602202	-0.882165	-0.721474	-0.588947
Fe2O3-3-a	0.350754	-0.761389	0.13004	-0.331575	0.139876	-0.240551	-0.548931
Fe2O3-3-b	0.350754	-0.761389	0.13004	-0.331575	0.139876	-0.240551	-0.548931
Fe2O3-3-c	0.350754	-0.761389	0.13004	-0.331575	0.139876	-0.240551	-0.548931
Fe2O3-3-d	0.350754	-0.761389	0.13004	-0.331575	0.139876	-0.240551	-0.548931
La2O3-a	1.39379	1.54431	1.64364	-0.622248	-0.471345	0.300487	-0.0687285
La2O3-b	1.39379	1.54431	1.64364	-0.622248	-0.471345	0.300487	-0.0687285
La2O3-c	1.39379	1.54431	1.64364	-0.622248	-0.471345	0.300487	-0.0687285
La2O3-d	1.39379	1.54431	1.64364	-0.622248	-0.471345	0.300487	-0.0687285
TiO2-a-1-a	0.761952	-0.220051	0.440778	-0.542062	-0.280965	-0.180436	-0.42888
TiO2-r-1-b	0.761952	-0.220051	0.440778	-0.542062	-0.280965	-0.180436	-0.42888
TiO2-r-1-c	0.761952	-0.220051	0.440778	-0.542062	-0.280965	-0.180436	-0.42888
TiO2-r-1-d	0.761952	-0.220051	0.440778	-0.542062	-0.280965	-0.180436	-0.42888
TiO2-a-1-a	0.471104	-0.280199	0.460826	-0.391714	-0.371145	0.360602	-0.42888
TiO2-a-1-b	0.471104	-0.280199	0.460826	-0.391714	-0.371145	0.360602	-0.42888
TiO2-a-1-c	0.471104	-0.280199	0.460826	-0.391714	-0.371145	0.360602	-0.42888
TiO2-a-1-d	0.471104	-0.280199	0.460826	-0.391714	-0.371145	0.360602	-0.42888
TiO2-a-2-a	0.852216	-0.310274	-0.140603	-0.261412	0.00961561	0.400679	-0.468897
TiO2-a-2-b	0.852216	-0.310274	-0.140603	-0.261412	0.00961561	0.400679	-0.468897
TiO2-a-2-c	0.852216	-0.310274	-0.140603	-0.261412	0.00961561	0.400679	-0.468897
TiO2-a-2-d	0.852216	-0.310274	-0.140603	-0.261412	0.00961561	0.400679	-0.468897
TiO2-a-2-a	0.771982	-0.49072	0.591136	-0.642294	-1.22285	-1.45288	-0.508914
TiO2-a-2-b	0.771982	-0.49072	0.591136	-0.642294	-1.22285	-1.45288	-0.508914
TiO2-a-2-c	0.771982	-0.49072	0.591136	-0.642294	-1.22285	-1.45288	-0.508914
TiO2-a-2-d	0.771982	-0.49072	0.591136	-0.642294	-1.22285	-1.45288	-0.508914
α-Al2O3-a	0.902362	-0.220051	-0.481413	-0.101041	-0.581565	1.29239	0.14136
α-Al2O3-b	0.902362	-0.220051	-0.481413	-0.101041	-0.581565	1.29239	0.14136
α-Al2O3-c	0.902362	-0.220051	-0.481413	-0.101041	-0.581565	1.29239	0.14136
α-Al2O3-d	0.902362	-0.220051	-0.481413	-0.101041	-0.581565	1.29239	0.14136
Dy2O3-a	-0.190825	-0.26015	-0.321032	-0.542062	0.360316	0.971775	-0.548931
Dy2O3-b	-0.190825	-0.26015	-0.321032	-0.542062	0.360316	0.971775	-0.548931
Dy2O3-c	-0.190825	-0.26015	-0.321032	-0.542062	0.360316	0.971775	-0.548931
Dy2O3-d	-0.190825	-0.26015	-0.321032	-0.542062	0.360316	0.971775	-0.548931
NiO-1-a	0.521251	-0.611017	0.931946	0.390096	-0.140685	0.981794	-0.548931
NiO-1-b	0.521251	-0.611017	0.931946	0.390096	-0.140685	0.981794	-0.548931
NiO-1-c	0.521251	-0.611017	0.931946	0.390096	-0.140685	0.981794	-0.548931
NiO-1-d	0.521251	-0.611017	0.931946	0.390096	-0.140685	0.981794	-0.548931
NiO-2-a	0.26049	-0.590968	0.591136	0.0893998	-0.0404844	1.06195	-0.548931
NiO-2-b	0.26049	-0.590968	0.591136	0.0893998	-0.0404844	1.06195	-0.548931
NiO-2-c	0.26049	-0.590968	0.591136	0.0893998	-0.0404844	1.06195	-0.548931
NiO-2-d	0.26049	-0.590968	0.591136	0.0893998	-0.0404844	1.06195	-0.548931
In2O3-1-a	0.721835	-0.631067	0.921922	-0.562109	-0.791985	1.67312	-0.508914
In2O3-1-b	0.721835	-0.631067	0.921922	-0.562109	-0.791985	1.67312	-0.508914
In2O3-1-c	0.721835	-0.631067	0.921922	-0.562109	-0.791985	1.67312	-0.508914
In2O3-1-d	0.721835	-0.631067	0.921922	-0.562109	-0.791985	1.67312	-0.508914
In2O3-2-a	0.782011	-0.621042	0.460826	-0.511993	-0.842085	1.72322	-0.228796
In2O3-2-b	0.782011	-0.621042	0.460826	-0.511993	-0.842085	1.72322	-0.228796
In2O3-2-c	0.782011	-0.621042	0.460826	-0.511993	-0.842085	1.72322	-0.228796
In2O3-2-d	0.782011	-0.621042	0.460826	-0.511993	-0.842085	1.72322	-0.228796
Tm2O3-a	0.992625	0.932799	0.901874	-0.792643	0.370336	-0.410878	-0.588947
Tm2O3-b	0.992625	0.932799	0.901874	-0.792643	0.370336	-0.410878	-0.588947
Tm2O3-c	0.992625	0.932799	0.901874	-0.792643	0.370336	-0.410878	-0.588947
Tm2O3-d	0.992625	0.932799	0.901874	-0.792643	0.370336	-0.410878	-0.588947
Tb2O3-a	1.84511	-0.380447	1.48326	-0.772596	-0.190785	-0.821666	-0.548931
Tb2O3-b	1.84511	-0.380447	1.48326	-0.772596	-0.190785	-0.821666	-0.548931
Tb2O3-c	1.84511	-0.380447	1.48326	-0.772596	-0.190785	-0.821666	-0.548931
Tb2O3-d	1.84511	-0.380447	1.48326	-0.772596	-0.190785	-0.821666	-0.548931
Bi2O3-a	0.832157	-0.751364	0.0999685	-0.0108323	0.680956	0.530929	-0.548931
Bi2O3-b	0.832157	-0.751364	0.0999685	-0.0108323	0.680956	0.530929	-0.548931
Bi2O3-c	0.832157	-0.751364	0.0999685	-0.0108323	0.680956	0.530929	-0.548931
Bi2O3-d	0.832157	-0.751364	0.0999685	-0.0108323	0.680956	0.530929	-0.548931
Sm2O3-a	0.380841	-0.560893	0.530993	-0.702434	-0.351105	-0.551147	-0.508914
Sm2O3-b	0.380841	-0.560893	0.530993	-0.702434	-0.351105	-0.551147	-0.508914
Sm2O3-c	0.380841	-0.560893	0.530993	-0.702434	-0.351105	-0.551147	-0.508914
Sm2O3-d	0.380841	-0.560893	0.530993	-0.702434	-0.351105	-0.551147	-0.508914
Yb2O3-a	0.66166	0.100742	-0.42127	-0.0308787	0.340276	0.961756	-0.548931
Yb2O3-b	0.66166	0.100742	-0.42127	-0.0308787	0.340276	0.961756	-0.548931
Yb2O3-c	0.66166	0.100742	-0.42127	-0.0308787	0.340276	0.961756	-0.548931
Yb2O3-d	0.66166	0.100742	-0.42127	-0.0308787	0.340276	0.961756	-0.548931
MgO-a	0.681718	-0.761389	1.5033	0.360026	1.9535	-0.0602052	1.62198
MgO-b	0.681718	-0.761389	1.5033	0.360026	1.9535	-0.0602052	1.62198
MgO-c	0.681718	-0.761389	1.5033	0.360026	1.9535	-0.0602052	1.62198
MgO-d	0.681718	-0.761389	1.5033	0.360026	1.9535	-0.0602052	1.62198
MoO3-a	0.982596	-0.651116	-0.451342	-0.261412	-0.671745	-1.95384	2.39231
MoO3-b	0.982596	-0.651116	-0.451342	-0.261412	-0.671745	-1.95384	2.39231
MoO3-c	0.982596	-0.651116	-0.451342	-0.261412	-0.671745	-1.95384	2.39231
MoO3-d	0.982596	-0.651116	-0.451342	-0.261412	-0.671745	-1.95384	2.39231
Sb2O3-a	0.912391	-0.530819	1.14245	-0.4719	0.871336	-0.711455	0.14136
Sb2O3-b	0.912391	-0.530819	1.14245	-0.4719	0.871336	-0.711455	0.14136
Sb2O3-c	0.912391	-0.530819	1.14245	-0.4719	0.871336	-0.711455	0.14136
Sb2O3-d	0.912391	-0.530819	1.14245	-0.4719	0.871336	-0.711455	0.14136
ZnO-2-a	-1.61498	-0.811513	-2.40599	-0.201273	0.781156	0.420718	2.35229
ZnO-2-b	-1.61498	-0.811513	-2.40599	-0.201273	0.781156	0.420718	2.35229
ZnO-2-c	-1.61498	-0.811513	-2.40599	-0.201273	0.781156	0.420718	2.35229
ZnO-2-d	-1.61498	-0.811513	-2.40599	-0.201273	0.781156	0.420718	2.35229
ZnO-3-a	-1.28401	-0.671166	-2.41601	-0.491946	-0.761925	0.52091	2.11219
ZnO-3-b	-1.28401	-0.671166	-2.41601	-0.491946	-0.761925	0.52091	2.11219
ZnO-3-c	-1.28401	-0.671166	-2.41601	-0.491946	-0.761925	0.52091	2.11219
ZnO-3-d	-1.28401	-0.671166	-2.41601	-0.491946	-0.761925	0.52091	2.11219
Gd2O3-a	0.952508	0.261139	0.541017	-0.301505	-0.481365	-0.270609	-0.468897
Gd2O3-b	0.952508	0.261139	0.541017	-0.301505	-0.481365	-0.270609	-0.468897
Gd2O3-c	0.952508	0.261139	0.541017	-0.301505	-0.481365	-0.270609	-0.468897
α-MnO2-1-a	-1.26395	0.0305688	-0.000269699	0.0793766	-0.581565	0.0900832	-0.30883
α-MnO2-1-b	-1.26395	0.0305688	-0.000269699	0.0793766	-0.581565	0.0900832	-0.30883
α-MnO2-1-c	-1.26395	0.0305688	-0.000269699	0.0793766	-0.581565	0.0900832	-0.30883
α-MnO2-1-d	-1.26395	0.0305688	-0.000269699	0.0793766	-0.581565	0.0900832	-0.30883
Co3O4-2-a	-2.01615	-0.72129	0.26035	0.33998	-0.0404844	-0.961936	-0.588947
Co3O4-2-b	-2.01615	-0.72129	0.26035	0.33998	-0.0404844	-0.961936	-0.588947
Co3O4-2-c	-2.01615	-0.72129	0.26035	0.33998	-0.0404844	-0.961936	-0.588947
Fe2O3-4-a	0.541309	-0.230075	0.0498494	-0.431807	0.0296556	-0.290647	-0.188779
Fe2O3-4-b	0.541309	-0.230075	0.0498494	-0.431807	0.0296556	-0.290647	-0.188779
Fe2O3-4-c	0.541309	-0.230075	0.0498494	-0.431807	0.0296556	-0.290647	-0.188779
Fe2O3-4-d	0.541309	-0.230075	0.0498494	-0.431807	0.0296556	-0.290647	-0.188779
